# Supplementary material
Source: publisher site journal article supplement (https://www.dovepress.com/get_supplementary_file.php?f=329036.docx)
Supplement: Supplementary file 1 [file get_supplementary_file.php]

Supplemental Table 1. Model fitting of latent profile analysis according to classes of personality profiles of nurses

| Model | Free parameters | AIC | BIC | Adjusted-  BIC | Entropy | LMR-LRT (*p*) | BLRT  (*p*) | Class probability |
| --- | --- | --- | --- | --- | --- | --- | --- | --- |
| One-class | 10 | 13537.48 | 13586.08 | 13554.32 | - | - | - | 1 |
| Two-class | 16 | 12682.79 | 12760.55 | 12709.73 | 0.81 | <0.001 | <0.001 | 0.75/ 0.25 |
| Three-class | 22 | 12534.82 | 12641.73 | 12571.86 | 0.79 | 0.001 | 0.001 | 0.64/0.30/0.06 |
| Four-class | 28 | 12439.78 | 12575.85 | 12486.92 | 0.84 | 0.43 | 0.44 | 0.60/0.31/0.02/0.06 |

LPA modeling was conducted using following code in Mplus:

FILE IS E:\analysis.dat;

VARIABLE:

NAMES ARE Z_VAR1 Z_VAR2 Z_VAR3 Z_VAR4 Z_VAR5 ;

Classes=c(3);

Analysis:

Type=Mixture;

starts=200 10;

processor=2;

LRTBOOTSTRAP=200;!

OUTPUT: TECH1 TECH8 TECH11 TECH14;
